# Supplementary material for: Facile and template-free fabrication of hierarchical coral spheres for acetone gas sensors
Source: Royal Society of Chemistry journal article supplement (doi:10.1039/d3dt01560b), 2023-01-01
Supplement: d3dt01560b1.pdf [file d3dt01560b1.pdf]

Supporting information

## **Facile and template-free fabrication of hierarchical coral spheres for acetone gas sensor**

**Ying Liu,<sup>a</sup> Baoteng Li,<sup>a</sup> Sailong Xu,<sup>\*a</sup> Ying Guo<sup>\* a</sup>**

<sup>a</sup> State Key Laboratory of Chemical Resource Engineering, Beijing University of Chemical Technology,

P. O. 98, Beijing 100029, P.R.China. E-mail: guoying@mail.buct.edu.cn

As shown in Fig. S1 (a-b), the addition of sodium citrate and ammonium fluoride resulted in the formation of the unique coral spheres structure in ZnO material. Fig. S1 (c-d) shows that when only ammonium fluoride was added without sodium citrate, the ZnO material formed a sheet-like morphology, indicating that sodium citrate played a chelating agent role in the formation of coral spheres morphology. As shown in Fig. S1 (e-f), when ammonium fluoride was not added and only sodium citrate was added, the main morphology structure of ZnO material was spherical, and the surface of the spherical shape is sheet-like, indicating that ammonium fluoride acted as a structural guiding agent. Therefore, the formation of the unique morphology of ZnO coral spheres is attributed to the synergism of sodium citrate and ammonium fluoride. Sodium citrate acts as a complexing agent in the formation of spherical morphology of coral spheres, while ammonium fluoride acts as a structural directing agent. Without anyone of them, the coral sphere can not be obtained.

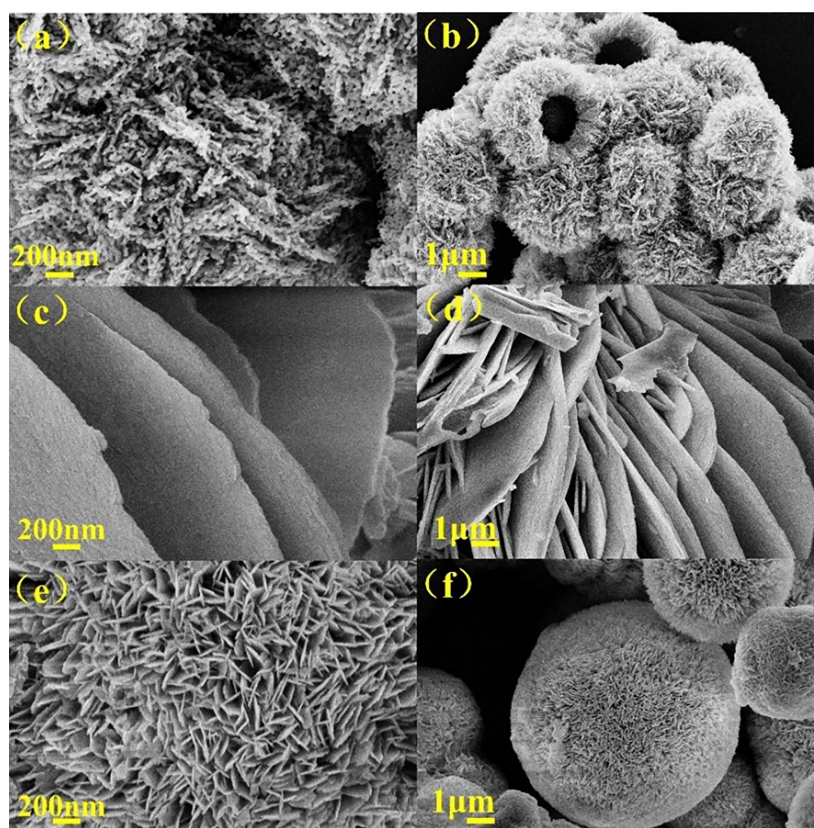

Fig. S1. SEM images of (a) ZnO coral spheres with ammonia fluoride and sodium citrate added together, (c-d) ZnO nanosheets without adding sodium citrate, (e-f) ZnO coral spheres without adding ammonia fluoride.

Fig. S2 shows the morphologies of ZnO, CeO<sub>2</sub>/ZnO-1, CeO<sub>2</sub>/ZnO-3, CeO<sub>2</sub>/ZnO-4 coral spheres. It can be observed that the morphologies of all as-synthesized samples are similar, and no other different morphologies are observed, indicating a small amount of CeO<sub>2</sub> could not affect the morphology of ZnO sample. And the diameters of the ZnO, CeO<sub>2</sub>/ZnO-1, CeO<sub>2</sub>/ZnO-3, CeO<sub>2</sub>/ZnO-4 coral spheres range from 7 to 10 μm. In addition, the obtained ZnO and CeO<sub>2</sub>/ZnO coral spheres are constructed by numerous primary nanoparticles. During the reaction, numerous primary nanoparticles aggregate and assemble into coral structure, meanwhile, with the help of citrate sodium, the coral structure can further assemble into coral spheres structure. The unique coral sphere structure of the materials has a large specific surface area and provides sufficient

adsorption sites for gas molecules.

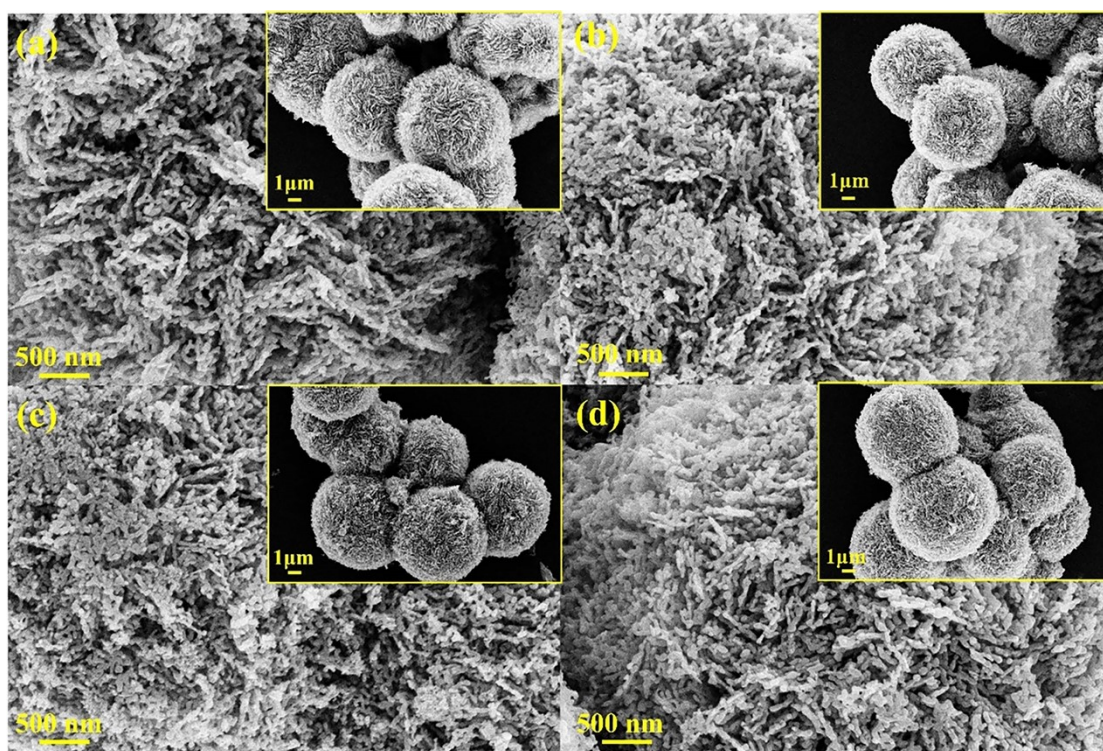

Fig. S2. SEM images of (a) ZnO; (b) CeO<sub>2</sub>/ZnO-1; (c) CeO<sub>2</sub>/ZnO-3; (d) CeO<sub>2</sub>/ZnO-4 coral spheres.

As shown in Fig.S3 (a-d), when the calcination temperature is 450°C and 550°C, the surface of coral spheres is mostly stacked with flake particles, and the spherical shape is not as regular as that of coral spheres calcined at 500°C. When the calcination temperature was raised to 650°C, the obtained material no longer possesses the structure of coral spheres, and serious sintering occurred. Therefore, the calcination temperature was set to be 500 °C for the subsequent research.



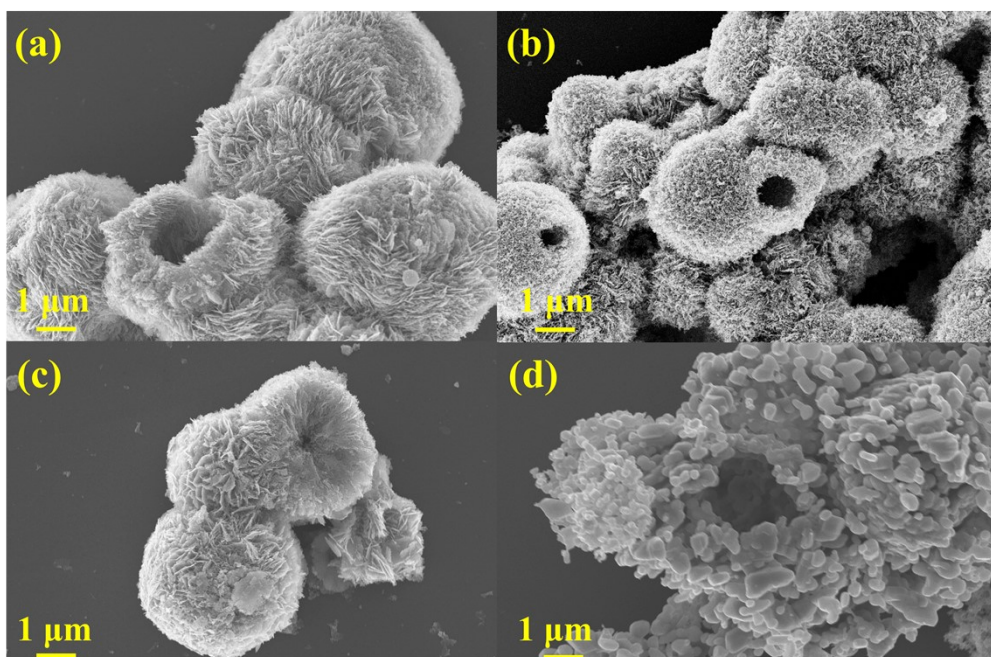

Fig. S3. SEM images of CeO<sub>2</sub>/ZnO-2 coral spheres obtained at different calcination temperatures (a) 450°C, (b) 500°C, (c) 550°C, (d) 650°C.

Fig. S4 and Fig. S5 show the resistance response and recovery curves of CeO<sub>2</sub>/ZnO-2 sensor to 10-800 ppm acetone at 245°C. Although CeO<sub>2</sub>/ZnO-2 sensor shows the highest response at 215°C, the practical application of sensors must be considered for sensitivity, working temperature, response time and recovery time, etc. Therefore, the recovery time of CeO<sub>2</sub>/ZnO-2 sensor along with the working temperature was further investigated. As shown in Fig. S6a and S6b, it could be seen that the response value of CeO<sub>2</sub>/ZnO-2 sensor is 202 and the response time is 16 s at 215°C. While the recovery time of CeO<sub>2</sub>/ZnO-2 sensor is 540 s at 215°C, which is very long. Although the response value of CeO<sub>2</sub>/ZnO-2 sensor is the highest at 215°C, it is not practical due to its long recovery time at this working temperature. Hence, it is not a suitable working temperature for CeO<sub>2</sub>/ZnO-2 sensor. As shown in Fig. S6c and S6d, the response value of CeO<sub>2</sub>/ZnO-2 sensor is 143 and the response time and recovery

time are 16 s and 240 s at 245°C, respectively. At 245°C, CeO<sub>2</sub>/ZnO-2 sensor still shows enhanced response value to acetone as compared to ZnO sensor and the optimum working temperature of CeO<sub>2</sub>/ZnO-2 sensors is still lower than that of ZnO sensor. Hence, considering the factors of the sensitivity and the recovery time, the optimum working temperature of CeO<sub>2</sub>/ZnO-2 sensor was set at 245°C for future investigation.

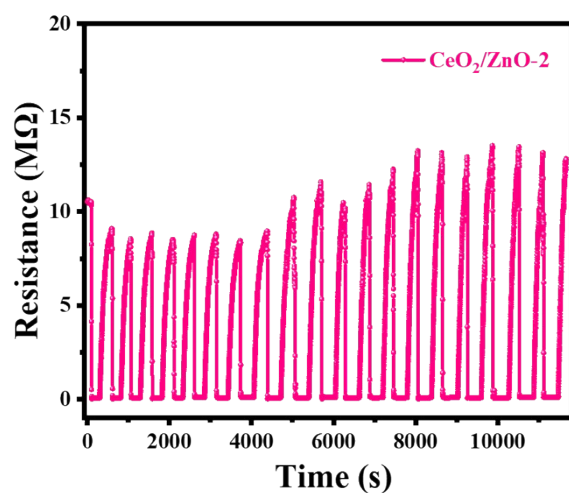

Fig. S4. Resistance response and recovery curves of CeO<sub>2</sub>/ZnO-2 sensor to 100 ppm acetone at 245°C.

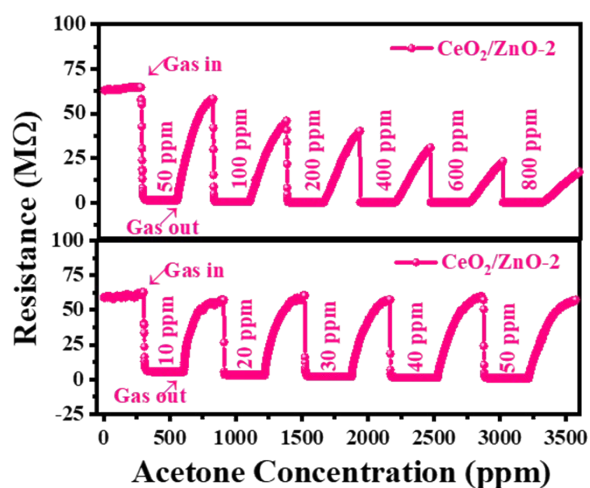

Fig. S5. Resistance response and recovery curves of CeO<sub>2</sub>/ZnO-2 sensor to 10-800 ppm acetone at 245°C.

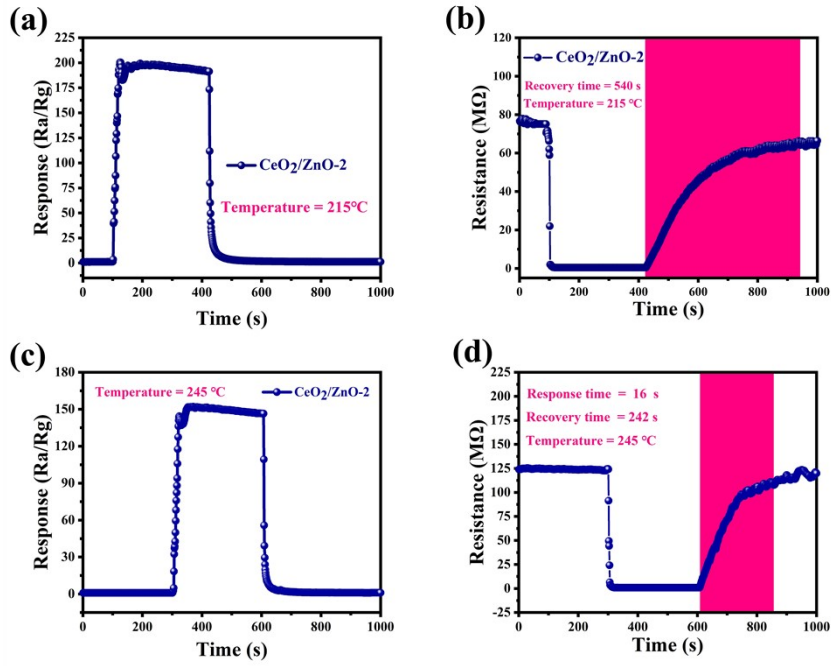

**Fig. S6.;** (a) Response and recovery curve of CeO<sub>2</sub>/ZnO-2 sensor to 100 ppm acetone at 215°C; (b) Resistance curve of CeO<sub>2</sub>/ZnO sensor to 100 ppm acetone at 215°C; (c) Response and recovery curve of CeO<sub>2</sub>/ZnO-2 sensor to 100 ppm acetone at 245°C; (d) Resistance curve of CeO<sub>2</sub>/ZnO-2 sensor to 100 ppm acetone at 245°C.

As shown in Table S1, the response time and recovery time of CeO<sub>2</sub>/ZnO-2 sensors to acetone gas were compared with the other three groups of sensors. It can be seen that the CeO<sub>2</sub>/ZnO-2 sensor has the shortest response and recovery time for acetone gas sensing.

**Table S1. Comparison of response time and recovery time of CeO<sub>2</sub>/ZnO sensors at 245°C.**

| Sensor                  | Response time (s) | Recovery time (s) |
|-------------------------|-------------------|-------------------|
| CeO <sub>2</sub> /ZnO-1 | 43                | 279               |
| CeO <sub>2</sub> /ZnO-2 | 16                | 242               |
| CeO <sub>2</sub> /ZnO-3 | 38                | 290               |
| CeO <sub>2</sub> /ZnO-4 | 49                | 302               |

As listed in Table S2, the acetone-sensing properties of the as-obtained CeO<sub>2</sub>/ZnO-2 sensor are compared with other ZnO-based sensors. Considering the optimum working temperature and sensitivity, the CeO<sub>2</sub>/ZnO-2 sensor exhibits a competitive performance in comparison with other ZnO-based sensors toward acetone gas. From the above results, it is believed that the CeO<sub>2</sub>/ZnO-2 sensor has potential for detecting the acetone gas.

**Table S2. Comparison of gas-sensing performance of acetone sensors based on ZnO.**

| Materials                             | Temperature (°C) | Concentration (ppm) | Response (Ra/Rg) | References                                        |
|---------------------------------------|------------------|---------------------|------------------|---------------------------------------------------|
| Fe-ZnO porous nanosheets              | 350              | 100                 | 105.7            | Mater. Sci. Semicond. Process., 2022, 148, 106807 |
| ZnO/ZnFe <sub>2</sub> O <sub>4</sub>  | 260              | 100                 | 18.92            | Ceram. Int., 2020, 46, 5960-5967                  |
| ZnO@CeO <sub>2</sub> nanofibers       | 370              | 1                   | 8.2              | Ceram. Int., 2019, 45, 4103-4107                  |
| CeO <sub>2</sub> /ZnO composite       | 320              | 5                   | 16.2             | Funct. Mater. Lett., 2020, 13, 2050013-2050017.   |
| 5Pt/ZnO                               | 190              | 100                 | 47.7             | Mater. Lett., 2021,304, 130682-130682             |
| Ni-ZnO maize straw                    | 340              | 100                 | 68               | Sens. Actuators, B, 2017, 243,1224-1230           |
| α-Fe <sub>2</sub> O <sub>3</sub> /ZnO | 300              | 50                  | 45.25            | ACS Appl. Nano Mater., 2022, 5, 5745–5755         |
| Co <sub>3</sub> O <sub>4</sub> /ZnO   | 273              | 50                  | 201              | J. Mater. Sci.-Mater. Electron., 2023, 34, 128    |
| Zn <sub>2</sub> TiO <sub>4</sub> -ZnO | 370              | 100                 | 33.4             | Rare Matels, 2021, 40, 1528-1535                  |
| CeO <sub>2</sub> /ZnO coral spheres   | 245              | 100                 | 143              | this work                                         |
